# Supplementary material for: Disrupted stepwise functional brain organization in overweight individuals
Source: PubMed Central journal article supplement (PMC8748821; doi:10.1038/s42003-021-02957-7), 2022-01-10
Supplement: 42003_2021_2957_MOESM1_ESM.pdf [file 42003_2021_2957_MOESM1_ESM.pdf]

## Supplementary Information

### **Disrupted stepwise functional brain organization in overweight individuals**

Hyebin Lee<sup>1,2</sup>, Junmo Kwon<sup>1,2</sup>, Jong-eun Lee<sup>1,2</sup>, Bo-yong Park<sup>2,3\*</sup>, and Hyunjin Park<sup>2,4\*</sup>

<sup>1</sup> Department of Electrical and Computer Engineering, Sungkyunkwan University, Suwon, Korea

<sup>2</sup> Center for Neuroscience Imaging Research, Institute for Basic Science, Suwon, Korea

<sup>3</sup> Department of Data Science, Inha University, Incheon, Korea

<sup>4</sup> School of Electronic and Electrical Engineering, Sungkyunkwan University, Suwon, Korea

\*Corresponding authors:

E-mail: [boyong.park@inha.ac.kr](mailto:boyong.park@inha.ac.kr) (BP), [hyunjinp@skku.edu](mailto:hyunjinp@skku.edu) (HP)

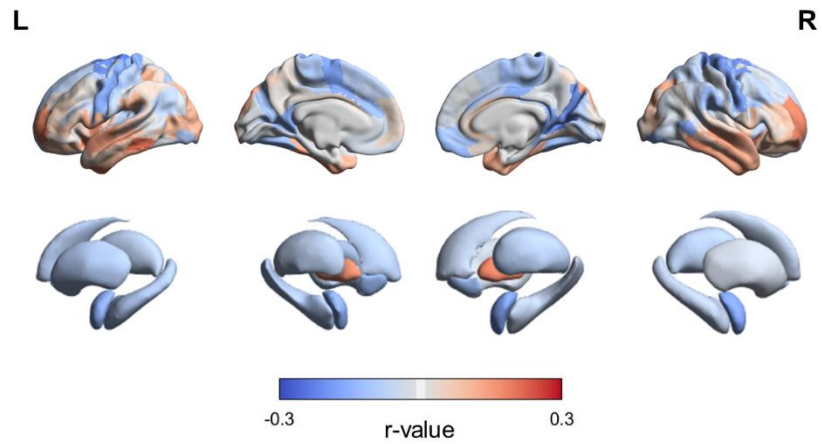

**Supplementary Figure 1. Consistency of brain regions associated with obesity phenotype.** We averaged correlation coefficients calculated based on the linear correlation between waist-to-hip ratio (WHR) and degree centrality values across 1,000 bootstraps and reported them on brain surfaces. *Abbreviations:* L, left; R, right.

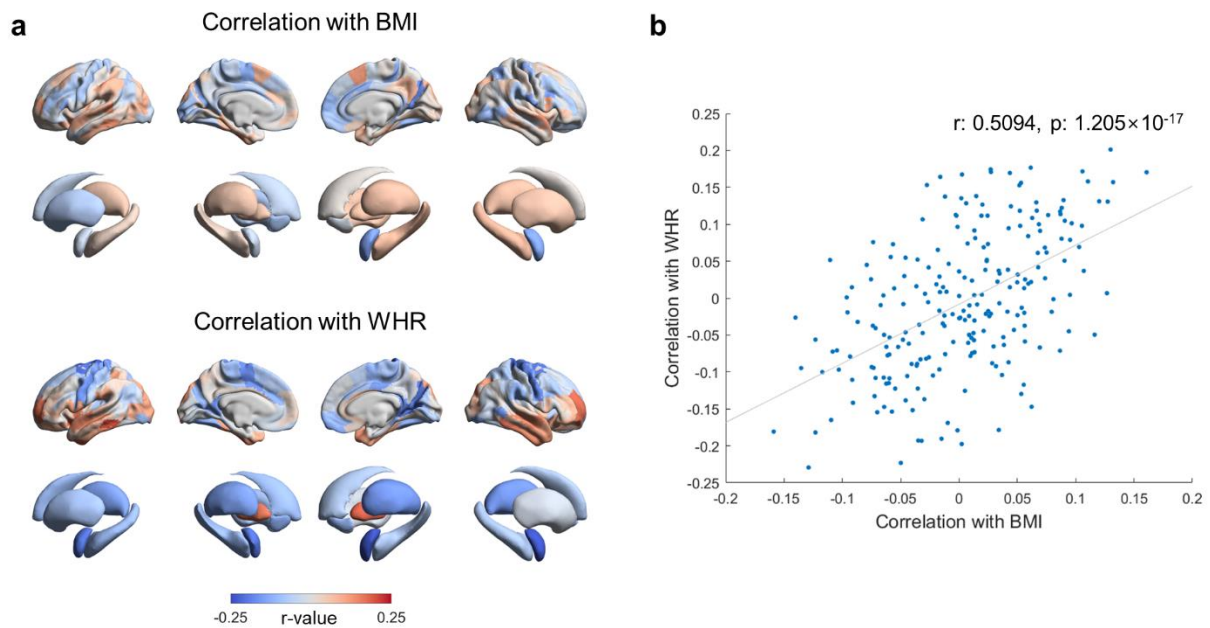

**Supplementary Figure 2. Correlations between degree centrality and obesity phenotypes. a** The correlation coefficients between degree centrality and obesity phenotypes of body mass index (BMI; top) and waist-to-hip ratio (WHR; bottom) are plotted on brain surfaces. **b** Linear correlation of the effects between BMI and WHR.

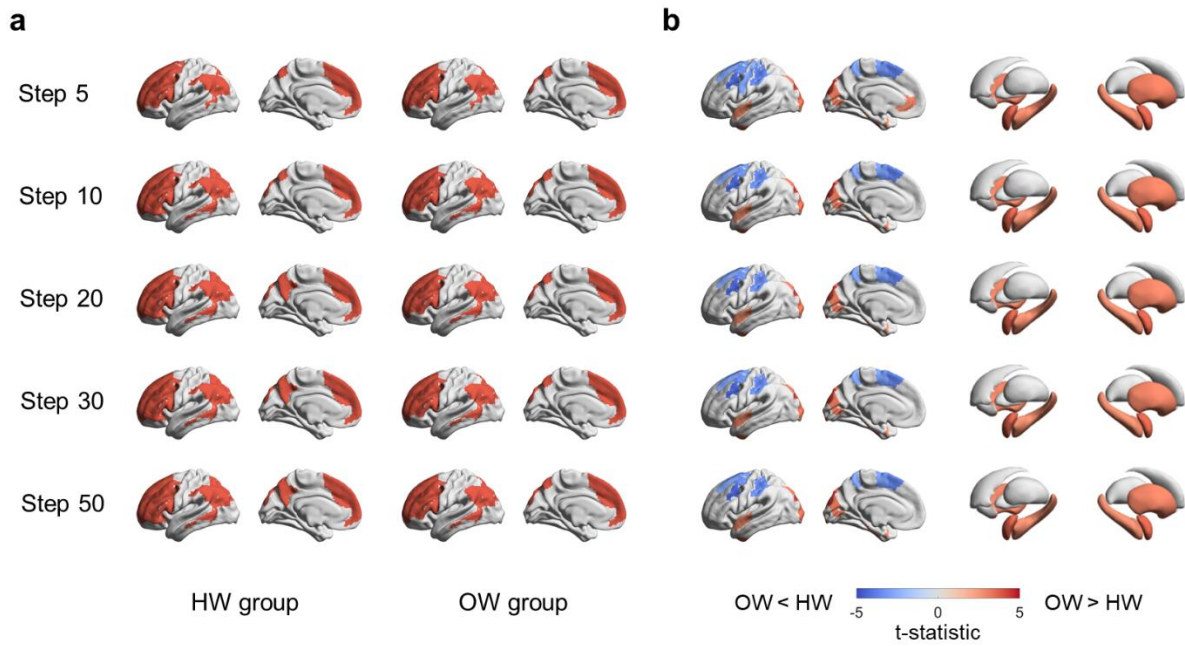

**Supplementary Figure 3. Stepwise functional connectivity for higher step distances. a** Hub regions across different step distances above step five, and **b** the t-statistics of brain regions that showed significant between-group differences in degree centrality. For details, see *Fig. 3*.

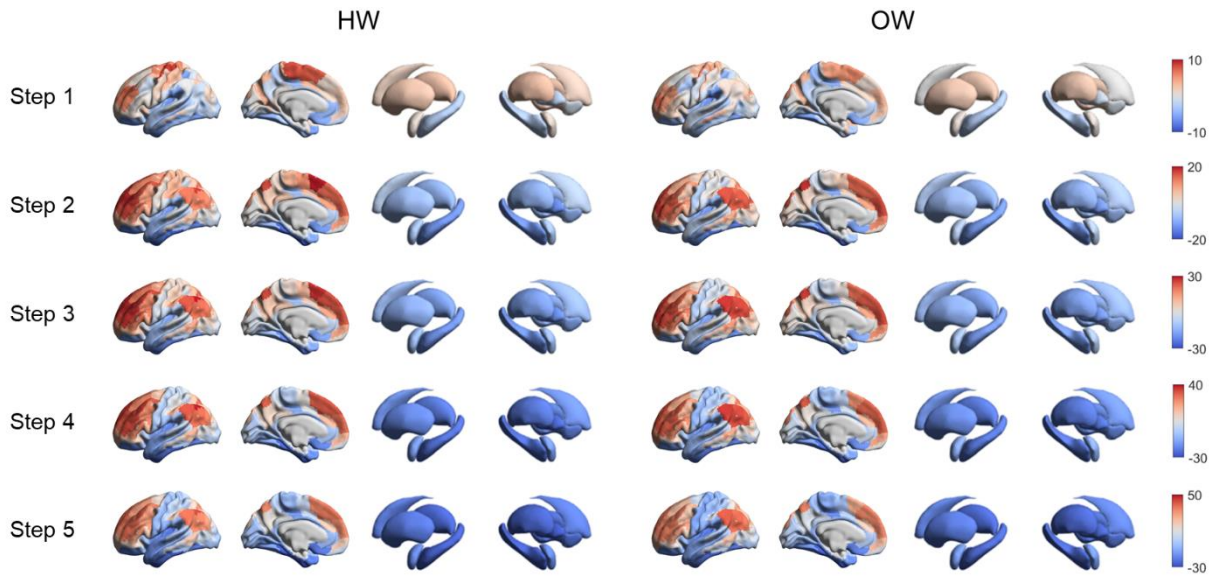

**Supplementary Figure 4. Consistency of stepwise functional connectivity in healthy weight (HW) and overweight (OW) groups.** We reported average degree centrality values for 1,000 bootstraps across different step distances.

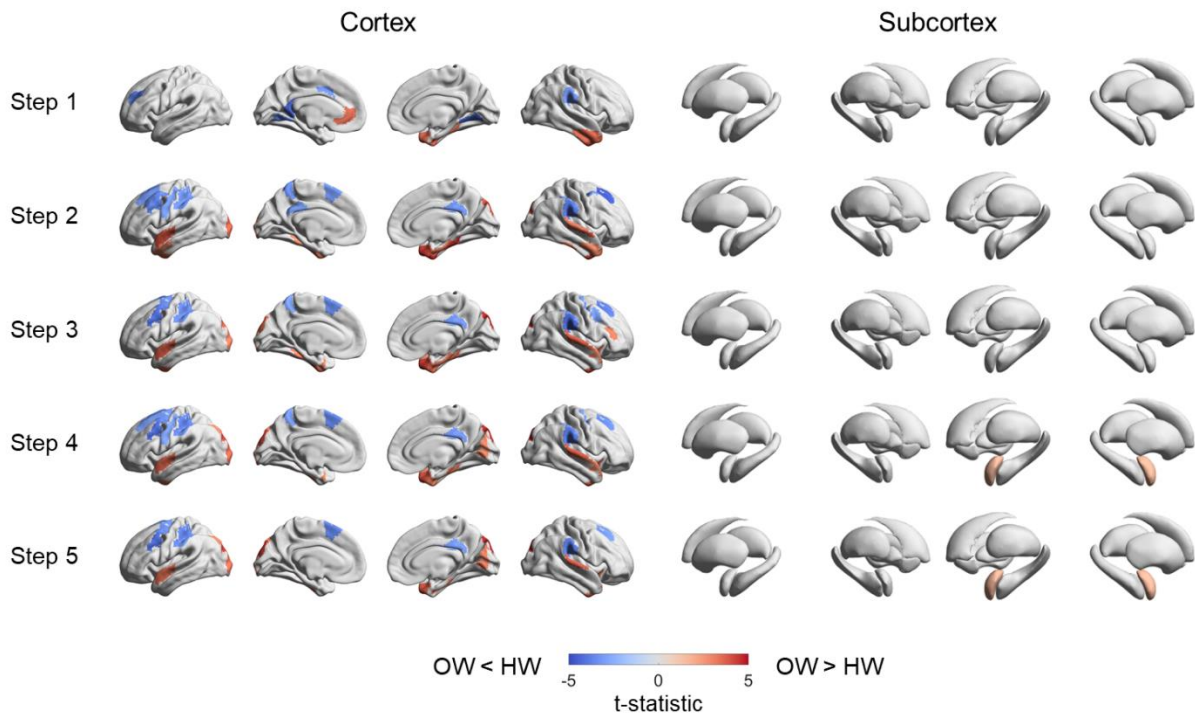

**Supplementary Figure 5. Comparison of SFC degree pattern between healthy weight (HW) and overweight (OW) groups for the cognition-related seed regions.** The regions that showed significant group differences in terms of degree centrality values are shown on brain surfaces and subcortex structures. For details, see *Fig. 3*.

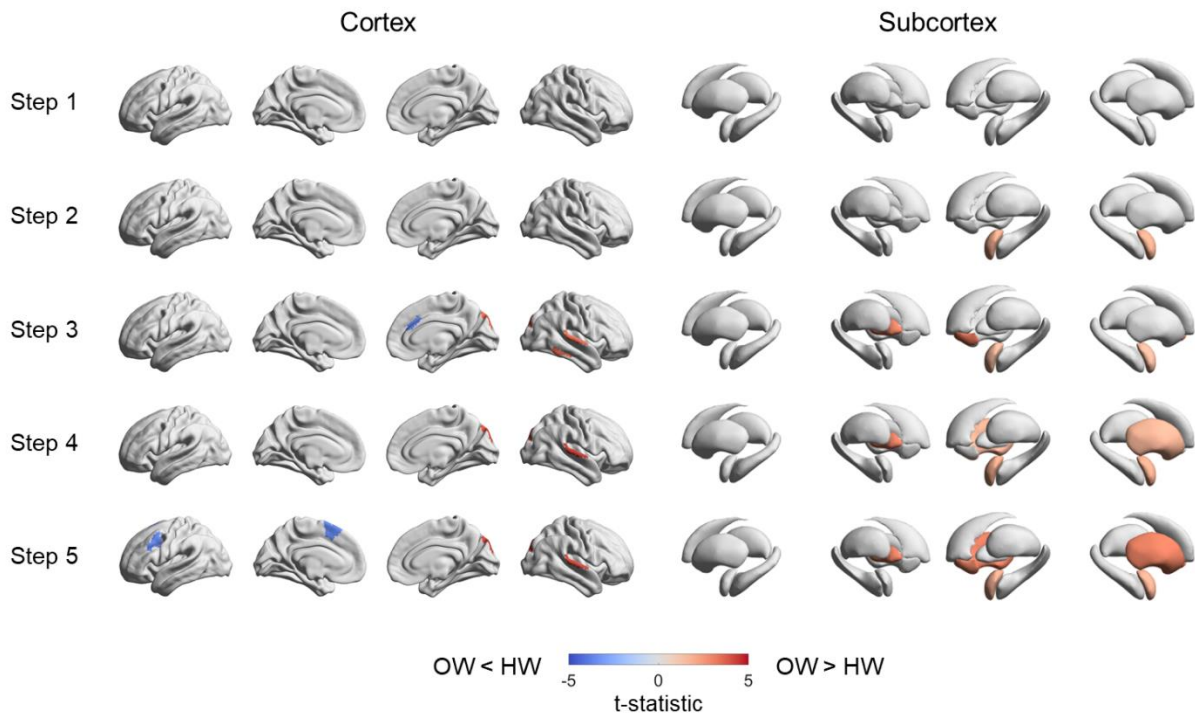

**Supplementary Figure 6. Comparison of SFC degree pattern between healthy weight (HW) and overweight (OW) groups for the reward-related seed regions.** The regions that showed significant group differences in terms of degree centrality values are shown on brain surfaces and subcortex structures. For details, see *Fig. 3*.



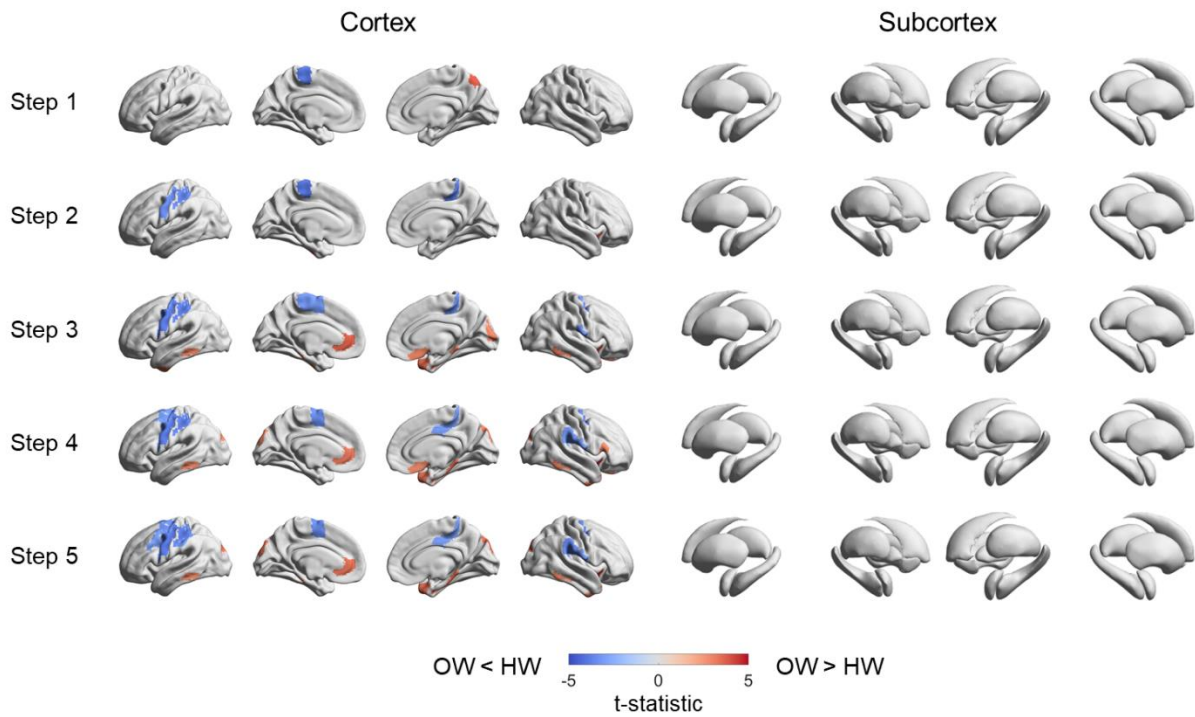

**Supplementary Figure 7. Comparison of SFC degree pattern between healthy weight (HW) and overweight (OW) groups for the sensorimotor-related seed regions.** The regions that showed significant group differences in terms of degree centrality values are shown on brain surfaces and subcortex structures. For details, see *Fig. 3*.



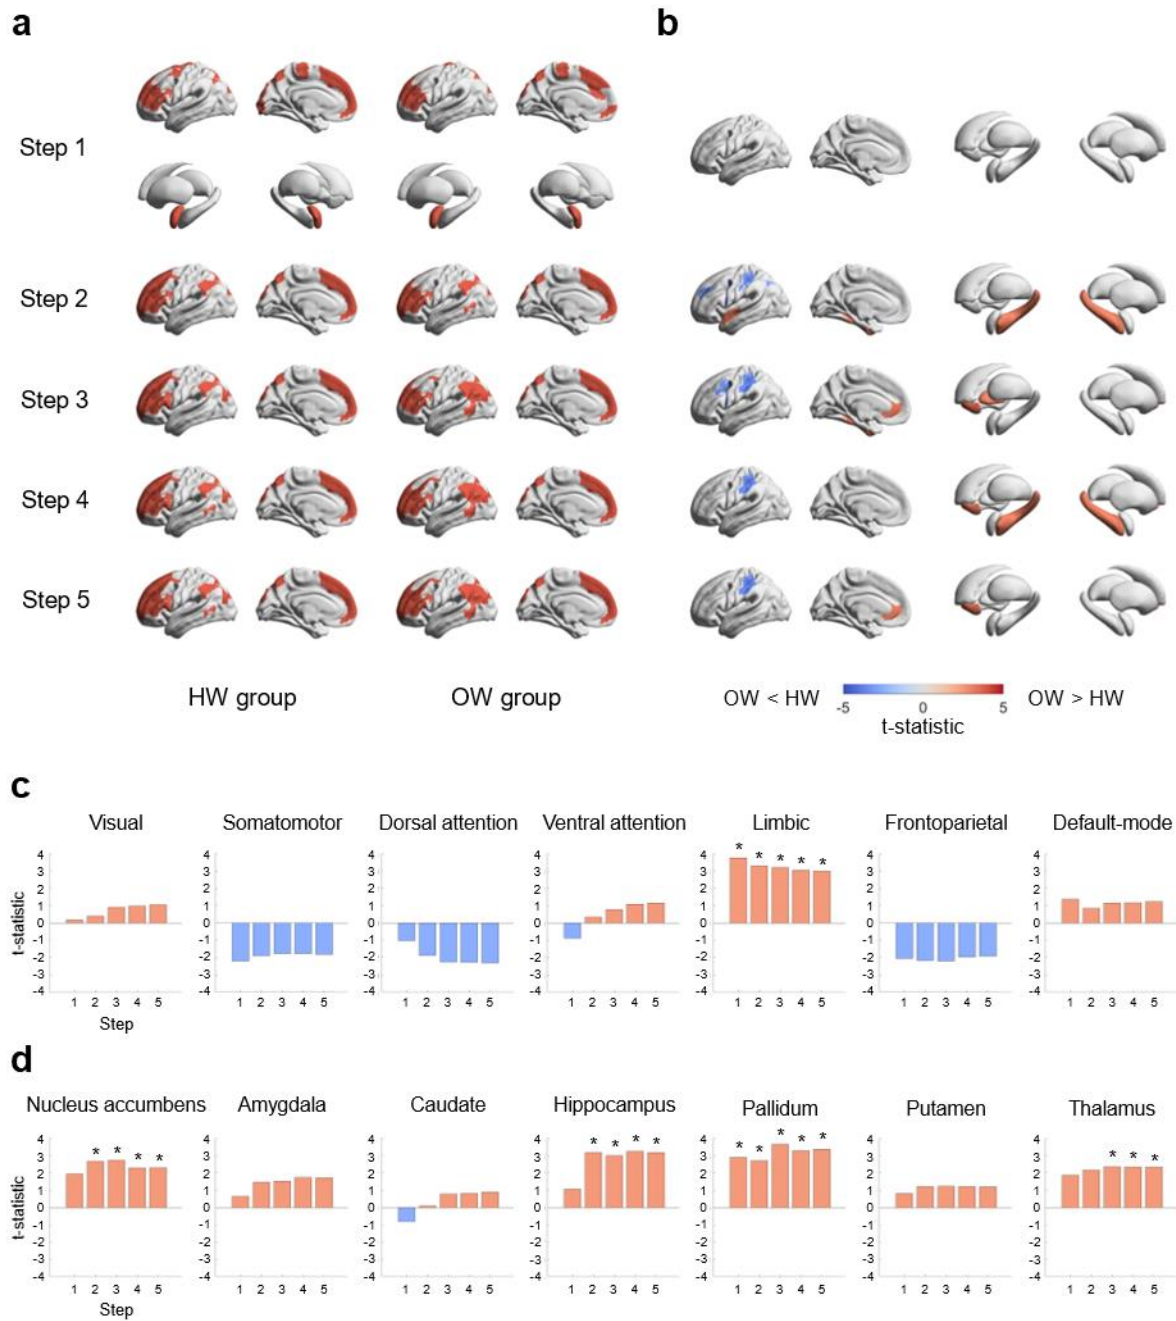

**Supplementary Figure 8. Stepwise functional connectivity in healthy weight (HW) and overweight (OW) groups after controlling for age and sex. a** Hub regions across different step distances, and **b** the t-statistics of brain regions that showed significant between-group differences in degree centrality. **c** Network-level and **d** subcortex-wise stratification of between-group differences. For details, see *Fig. 3* and *4*.

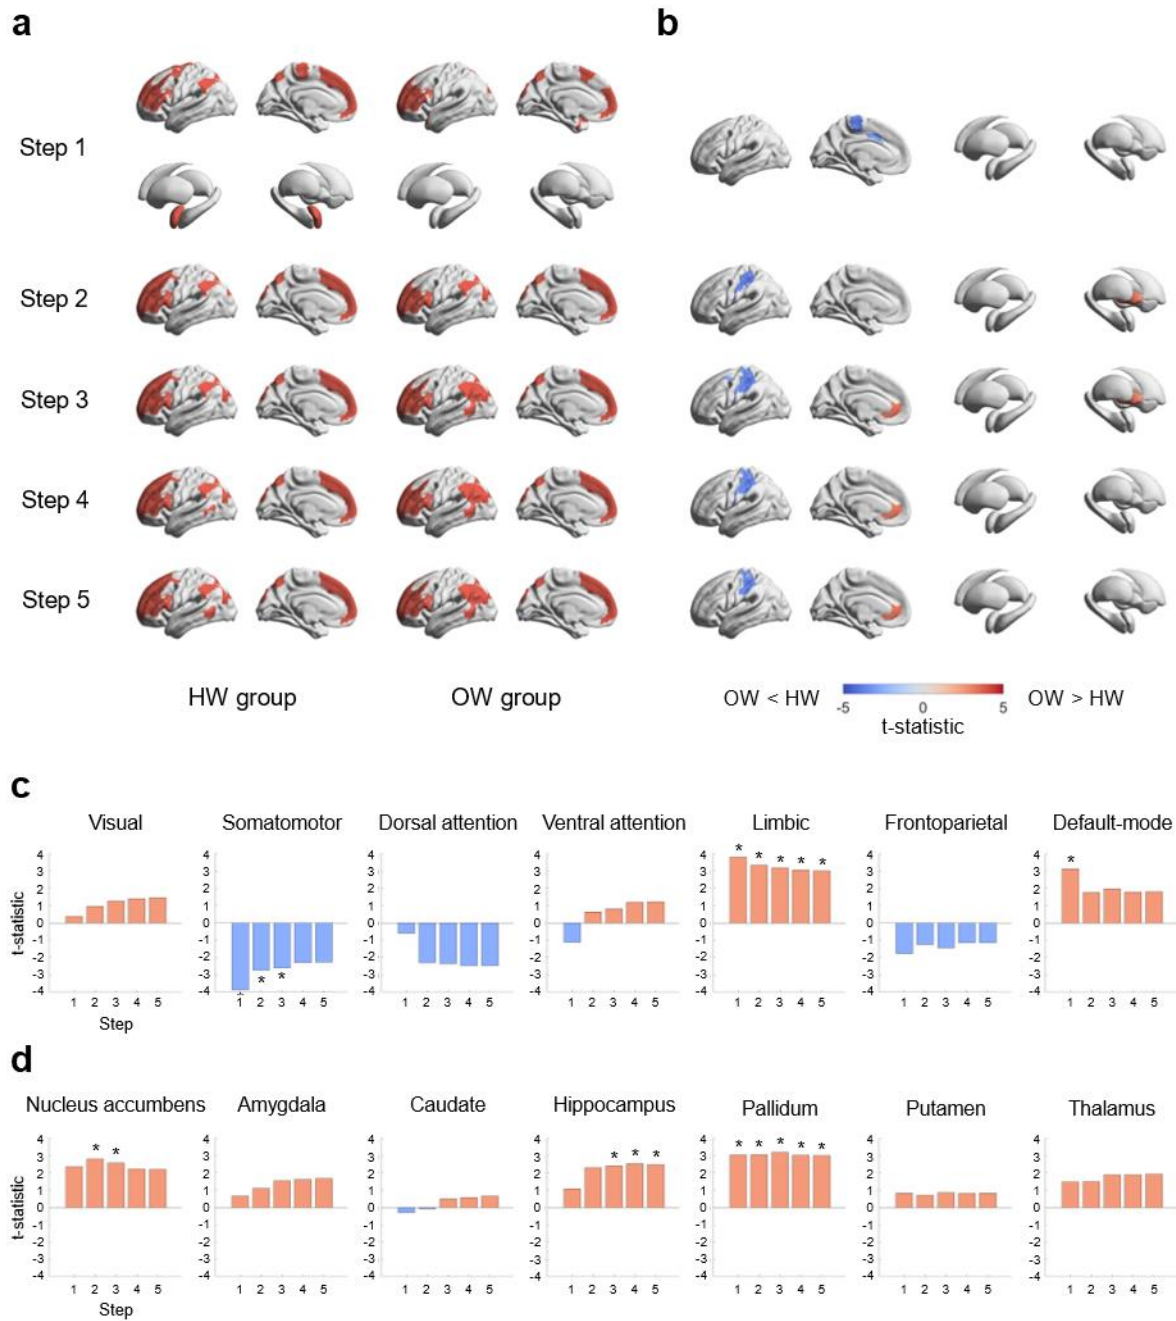

**Supplementary Figure 9. Stepwise functional connectivity in healthy weight (HW) and overweight (OW) groups after controlling for eating behavior scores. a** Hub regions across different step distances, and **b** the t-statistics of brain regions that showed significant between-group differences in degree centrality. **c** Network-level and **d** subcortex-wise stratification of the between-group differences. For details, see *Fig. 3* and *4*.

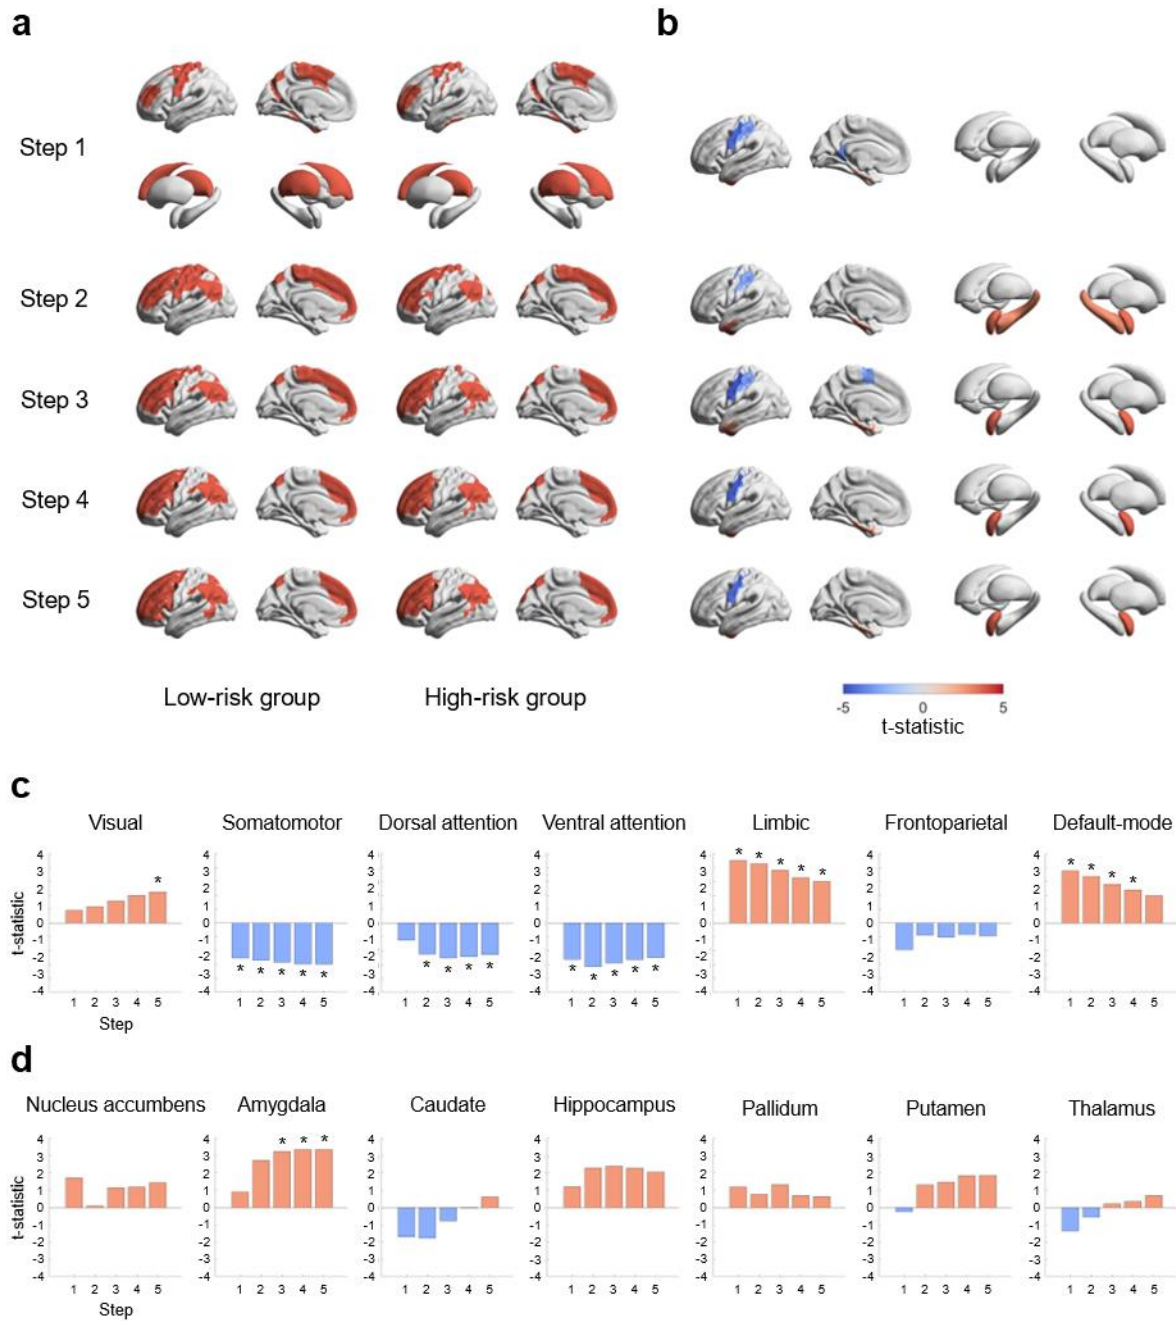

**Supplementary Figure 10. Stepwise functional connectivity in low- and high-health risk groups.** **a** Hub regions across different step distances, and **b** the t-statistics of brain regions that showed significant between-group differences in degree centrality. **c** Network-level and **d** subcortex-wise stratification of between-group differences. A representative iteration among 1,000 bootstraps was reported. For details, see *Fig. 3* and *4*.

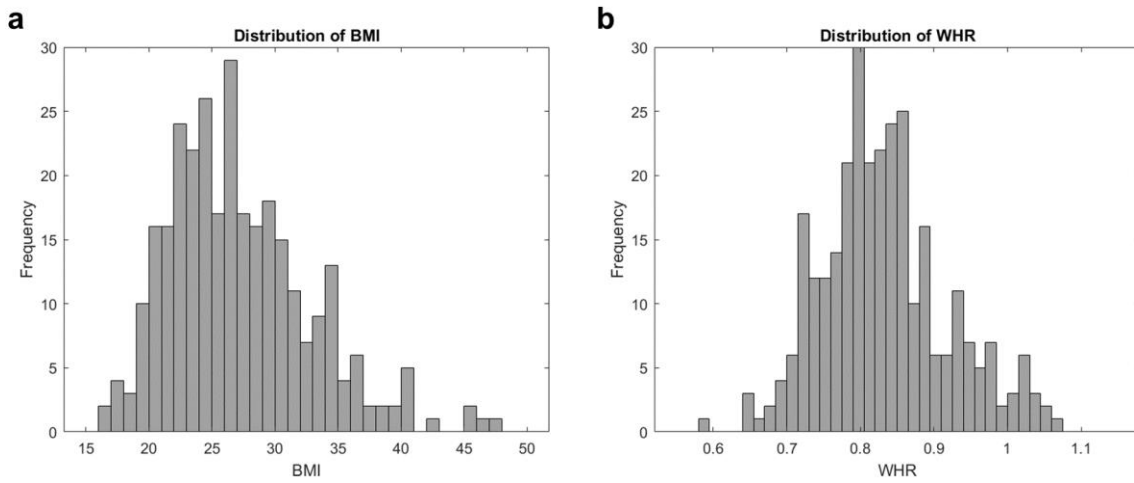

**Supplementary Figure 11. Obesity phenotype distribution. a** Distribution of body mass index (BMI) and **b** waist-to-hip ratio (WHR).
