# Supplementary material for: Disrupted stepwise functional brain organization in overweight individuals
Source: PubMed Central journal article supplement (PMC8748821; doi:10.1038/s42003-021-02957-7), 2022-01-10
Supplement: 42003_2021_2957_MOESM2_ESM.pdf [file 42003_2021_2957_MOESM2_ESM.pdf]

## Description of Additional Supplementary Data

**File name:** Supplementary Data 1

**Description:** Source data files of main figures.
